# Supplementary material
Source: bioRxiv or medRxiv preprint supplement (https://www.medrxiv.org/highwire/filestream/80902/field_highwire_adjunct_files/3/2020.05.11.20098285-4.pdf)
Supplement: Supplementary file [file 2020.05.11.20098285-4.pdf]

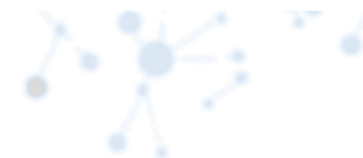

Analysis Name: common DE proteins for BKPyVN vs STA - 2020-05-10 02:04 PM

Analysis Creation Date: 2020-05-10

Build version: exported

Content version: 51963813 (Release Date: 2020-03-11)

### Experiment Metadata

| Name | Value |
|------|-------|
|------|-------|

### Analysis Settings

Reference set: Ingenuity Knowledge Base (Genes Only)

Relationship to include: Direct and Indirect

Includes Endogenous Chemicals

Optional Analyses: My Pathways My List

Filter Summary:

Consider only molecules and/or relationships where

(species = Rat OR Human OR Mouse OR Uncategorized) AND

(confidence = Experimentally Observed) AND

(tissues/cell lines = Cortical neurons OR Pro-B lymphocytes OR SK-N-SH OR Kidney Cancer Cell Lines not otherwise specified OR Heart OR Mast cells OR SF-295 OR Dorsal Root Ganglion OR Testis OR Lung Cancer Cell Lines not otherwise specified OR Macrophages not otherwise specified OR Other Monocytes OR Peripheral blood leukocytes not otherwise specified OR NCI-H332M OR Other Breast Cancer Cell Lines OR

Monocyte-derived macrophage OR Smooth Muscle OR RAW 264.7 OR Bladder OR SF-539 OR Other Granulocytes OR WEHI-231 OR B lymphocytes not otherwise specified OR Adipocytes OR RKO OR HT29 OR Min6 OR Other Colon Cancer Cell Lines OR Adrenal Gland OR HepG2 OR Kidney OR Lymphoma Cell Lines not otherwise specified OR Th17 cells OR Thymus OR Epithelial cells not otherwise specified OR Hippocampus OR Jurkat OR Other Lymphoma Cell Lines OR Activated Vd2 Gamma-delta T cells OR HOP-62 OR Calvaria OR Other Macrophages OR J-774A.1 OR Gray Matter OR Parietal Lobe OR Pheochromocytoma cell lines not otherwise specified OR Naive B cells OR Crypt OR CD4+ T-lymphocytes OR Lung OR Skin OR Other Prostate Cancer Cell Lines OR BDCA-1+ dendritic cells OR Natural T-regulatory cells OR NCI-H23 OR Lymphocytes not otherwise specified OR Cerebellum OR Other CNS Cell Lines OR RPMI-8266 OR Brain OR Hypothalamus OR Thyroid Gland OR Immune cells not otherwise specified OR OVCAR-3 OR SW-620 OR Breast Cancer Cell Lines not otherwise specified OR HS 578T OR Trachea OR LOX IMVI OR MDA-N OR Bone marrow cells not otherwise specified OR Cartilage Tissue OR TK-10 OR Putamen OR OVCAR-5 OR Other NK cells OR Other Melanoma Cell Lines OR Colon Cancer Cell Lines not otherwise specified OR MOLT-4 OR EK VX OR HCT-15 OR Granulosa cells OR Myeloma Cell Lines not otherwise specified OR Stem cells not otherwise specified OR A2780 OR MCF7 OR Naive helper T cells OR Other Pancreatic Cancer Cell Lines OR INS-1 OR T lymphocytes not otherwise specified OR Melanocytes OR Monocyte-derived dendritic cells not otherwise specified OR Granule cells OR Kidney cell lines not otherwise specified OR U2OS OR UACC-257 OR Thymocytes OR Choroid Plexus OR P19 OR Uterus OR Cytotoxic T cells OR Mononuclear leukocytes not otherwise specified OR MDA-MB-361 OR Other T lymphocytes OR Embryonic stem cells OR Granule Cell Layer OR Nervous System not otherwise specified OR HUVEC cells OR PC-3 OR Beta islet cells OR NB4 OR NK cells not otherwise specified OR Medulla Oblongata OR Splenocytes OR Cell Line not otherwise specified OR CD56bright NK cells OR Eosinophils OR A549-ATCC OR Other Kidney cell lines OR Hepatocytes OR NT2/D1 OR Fibroblast cell lines not otherwise specified OR CCRF-CEM OR Liver OR Smooth muscle cells not otherwise specified OR White Matter OR Other Peripheral blood leukocytes OR Hepatoma Cell Lines not otherwise specified OR Spinal Cord OR Mammary Gland OR Cos-7 cells OR PC-12 cells OR Ventricular Zone OR BA/F3 OR Organ Systems not otherwise specified OR MDA-MB-231 OR Immature monocyte-derived dendritic cells OR Astrocytes OR Central memory cytotoxic T cells OR Other Monocyte-derived dendritic cells OR Bone marrow-derived dendritic cells OR Skeletal Muscle OR BDCA-3+ dendritic cells OR Hematopoietic progenitor cells OR Other Bone marrow cells OR Other Ovarian Cancer Cell Lines OR Brainstem OR Tissues and Primary Cells not otherwise specified OR Immune cell lines not otherwise specified OR Intraepithelial T lymphocytes OR Other Cells OR Lens OR Neurons not otherwise specified OR Sciatic Nerve OR Chondrocytes OR Small Intestine OR 3T3-L1 cells OR UACC-62 OR A498 OR Prostate Gland OR Monocytes not otherwise specified OR SNB-75 OR Other Osteosarcoma Cell Lines OR Cells not otherwise specified OR CD56dim NK cells OR BT-474 OR HCC-2998 OR Peripheral blood monocytes OR Effector memory helper T cells OR Activated Vd1 Gamma-delta T cells OR Fibroblasts OR U266 OR Salivary Gland OR Subventricular Zone OR Amygdala OR Peritoneal macrophages OR RXF-393 OR NIH/3T3 cells OR Forestomach OR Other Nervous System OR Other Pheochromocytoma cell lines OR Keratinocytes OR Endothelial cells not otherwise specified OR Neuroblastoma Cell Lines not otherwise

specified OR Activated CD56dim NK cells OR Other Kidney Cancer Cell Lines OR Ovary OR Stromal cells OR Murine NKT cells OR Stomach OR Thalamus OR Cardiomyocytes OR Teratocarcinoma Cell Lines not otherwise specified OR Dendritic cells not otherwise specified OR 786-0 OR Neutrophils OR Spleen OR Th2 cells OR Vd2 Gamma-delta T cells OR CD34+ cells OR Striatum OR Other Neurons OR ACHN OR KM-12 OR SK-MEL-5 OR Cervical cancer cell line not otherwise specified OR Hep3B OR Other Tissues and Primary Cells OR Other Immune cell lines OR MEF cells OR Other B lymphocytes OR NCI-ADR-RES OR Microvascular endothelial cells OR U87MG OR UO-31 OR HMC-1 OR HeLa OR T47-D OR Plasmacytoid dendritic cells OR MDA-MB-468 OR Ovarian Cancer Cell Lines not otherwise specified OR Lymph node OR Pre-B lymphocytes OR Esophagus OR Other Lymphocytes OR MG-63 OR Central memory helper T cells OR LNCaP cells OR IGROV1 OR Sertoli cells OR Other Leukemia Cell Lines OR Other Teratocarcinoma Cell Lines OR Vd1 Gamma-delta T cells OR Other Epithelial cells OR COLO205 OR Caco2 cells OR Olfactory Bulb OR 293 cells OR U937 OR Other Fibroblast cell lines OR Memory T lymphocytes not otherwise specified OR Other Smooth muscle cells OR Other Cervical cancer cell line OR Cerebral Ventricles OR CAKI-1 OR H460 OR Pituitary Gland OR Other Memory T lymphocytes OR K-562 OR Bone marrow-derived macrophages OR Melanoma Cell Lines not otherwise specified OR Epidermis OR Vascular smooth muscle cells OR RBL-2H3 OR THP-1 OR Megakaryocytes OR SK-OV-3 OR Caudate Nucleus OR Other Endothelial cells OR DU-145 OR Oocytes OR NCI-H226 OR Osteosarcoma Cell Lines not otherwise specified OR Retina OR MALME-3M OR Nucleus Accumbens OR Osteoblasts OR M14 OR Substantia Nigra OR MDA-MB-435 OR Other Lung Cancer Cell Lines OR Pyramidal neurons OR Macrophage Cancer Cell Lines not otherwise specified OR Myeloid dendritic cells OR Other Mononuclear leukocytes OR Purkinje cells OR Effector memory RA+ cytotoxic T cells OR SK-MEL-28 OR SR OR Swiss 3T3 cells OR Trigeminal Ganglion OR Effector T cells OR Langerhans cells OR Other Stem cells OR PBMCs OR SW-480 OR Mature monocyte-derived dendritic cells OR PANC-1 OR Cornea OR Dermis OR Memory B cells OR SK-MEL-2 OR Granulocytes not otherwise specified OR J774 OR A375 OR Other Macrophage Cancer Cell Lines OR OVCAR-8 OR Pancreatic Cancer Cell Lines not otherwise specified OR HCT-116 OR OVCAR-4 OR Other Dendritic cells OR Leukemia Cell Lines not otherwise specified OR Large Intestine OR Microglia OR Pancreas OR HEL OR Activated CD56bright NK cells OR NCI-H522 OR Th1 cells OR SF-268 OR SN12C OR Other Cell Line OR Prostate Cancer Cell Lines not otherwise specified OR Other Immune cells OR Adipose OR Effector memory cytotoxic T cells OR Other Organ Systems OR BT-549 OR Peripheral blood lymphocytes OR Plasma cells OR Blood platelets OR Mesenchymal stem cells OR CNS Cell Lines not otherwise specified OR Other Hepatoma Cell Lines OR Activated helper T cells OR Other Myeloma Cell Lines OR Cerebral Cortex OR HL-60 OR HOP-92 OR Corpus Callosum OR U251 OR Placenta OR HuH7 OR Other Neuroblastoma Cell Lines) AND (mol. types = biologic drug OR canonical pathway OR chemical - endogenous mammalian OR chemical - endogenous non-mammalian OR chemical - kinase inhibitor OR chemical - other OR chemical - protease inhibitor OR chemical drug OR chemical reagent OR chemical toxicant OR complex OR cytokine OR disease OR enzyme OR function OR fusion gene/product OR G-protein coupled receptor OR group OR growth factor OR ion channel OR kinase OR ligand-dependent nuclear receptor OR mature microRNA OR microRNA OR other OR peptidase OR phosphatase OR transcription regulator OR translation regulator OR transmembrane receptor OR transporter) AND

(data sources = An Open Access Database of Genome-wide Association Results OR BIND OR BioGRID OR Catalogue Of Somatic Mutations In Cancer (COSMIC) OR Chemical Carcinogenesis Research Information System (CCRIS) OR ClinicalTrials.gov OR ClinVar OR Cognia OR DIP OR DrugBank OR Gene Ontology (GO) OR GVK Biosciences OR Hazardous Substances Data Bank (HSDB) OR HumanCyc OR Ingenuity Expert Findings OR Ingenuity ExpertAssist Findings OR IntAct OR Interactome studies OR MIPS OR miRBase OR miRecords OR Mouse Genome Database (MGD) OR Obesity Gene Map Database OR Online Mendelian Inheritance in Man (OMIM) OR TarBase OR TargetScan Human)

## Top Canonical Pathways

| Name                                           | p-value  | Overlap      |
|------------------------------------------------|----------|--------------|
| <b>EIF2 Signaling</b>                          | 1.73E-14 | 8.5 % 19/224 |
| <b>Regulation of eIF4 and p70S6K Signaling</b> | 4.95E-08 | 7.0 % 11/157 |
| <b>D-glucuronate Degradation I</b>             | 4.82E-07 | 100.0 % 3/3  |
| <b>mTOR Signaling</b>                          | 9.29E-07 | 5.2 % 11/210 |
| <b>Oxidative Phosphorylation</b>               | 2.46E-06 | 7.3 % 8/109  |

## Top Upstream Regulators

### Upstream Regulators

| Name          | p-value  | Predicted Activation |
|---------------|----------|----------------------|
| <b>MLXIPL</b> | 5.64E-18 | Activated            |
| <b>MYCN</b>   | 1.30E-16 |                      |
| <b>MYC</b>    | 1.61E-14 | Activated            |
| <b>CD 437</b> | 7.30E-14 | Inhibited            |

**RICTOR**

8.24E-14

**Causal Network**

| Name                | p-value  | Predicted Activation |
|---------------------|----------|----------------------|
| <b>SYVN1</b>        | 4.79E-20 | Inhibited            |
| <b>sapanisertib</b> | 7.67E-19 |                      |
| <b>MTORC2</b>       | 8.45E-19 |                      |
| <b>MLXIPL</b>       | 1.86E-18 | Activated            |
| <b>CUL7</b>         | 1.99E-18 |                      |

**Top Diseases and Bio Functions****Diseases and Disorders**

| Name                                       | p-value range       | # Molecules |
|--------------------------------------------|---------------------|-------------|
| <b>Cancer</b>                              | 7.88E-03 - 9.13E-14 | 175         |
| <b>Organismal Injury and Abnormalities</b> | 7.88E-03 - 9.13E-14 | 177         |
| <b>Gastrointestinal Disease</b>            | 7.88E-03 - 1.01E-10 | 148         |
| <b>Hepatic System Disease</b>              | 7.88E-03 - 1.01E-10 | 89          |
| <b>Connective Tissue Disorders</b>         | 7.88E-03 - 2.35E-09 | 53          |

**Molecular and Cellular Functions**

| Name                                         | p-value range       | # Molecules |
|----------------------------------------------|---------------------|-------------|
| <b>RNA Damage and Repair</b>                 | 9.04E-08 - 8.63E-19 | 27          |
| <b>Protein Synthesis</b>                     | 2.68E-03 - 2.74E-15 | 66          |
| <b>RNA Post-Transcriptional Modification</b> | 3.07E-03 - 1.64E-08 | 21          |
| <b>Amino Acid Metabolism</b>                 | 7.88E-03 - 1.48E-07 | 13          |
| <b>Small Molecule Biochemistry</b>           | 7.88E-03 - 1.48E-07 | 67          |

### Physiological System Development and Function

| Name                                             | p-value range       | # Molecules |
|--------------------------------------------------|---------------------|-------------|
| <b>Digestive System Development and Function</b> | 6.64E-04 - 6.18E-05 | 5           |
| <b>Embryonic Development</b>                     | 7.88E-03 - 6.18E-05 | 8           |
| <b>Hair and Skin Development and Function</b>    | 7.88E-03 - 6.18E-05 | 2           |
| <b>Hepatic System Development and Function</b>   | 6.64E-04 - 6.18E-05 | 5           |
| <b>Organ Development</b>                         | 7.88E-03 - 6.18E-05 | 8           |

### Top Tox Functions

### Assays: Clinical Chemistry and Hematology

| Name                                       | p-value range       | # Molecules |
|--------------------------------------------|---------------------|-------------|
| <b>Increased Levels of Potassium</b>       | 1.33E-01 - 1.33E-01 | 1           |
| <b>Increased Levels of Red Blood Cells</b> | 2.12E-01 - 2.12E-01 | 2           |

|                                                 |                     |   |
|-------------------------------------------------|---------------------|---|
| <b>Increased Levels of Creatinine</b>           | 3.48E-01 - 3.48E-01 | 1 |
| <b>Increased Levels of Alkaline Phosphatase</b> | 4.35E-01 - 4.35E-01 | 1 |
| <b>Increased Levels of Hematocrit</b>           | 5.40E-01 - 5.40E-01 | 1 |

### Cardiotoxicity

| Name                            | p-value range       | # Molecules |
|---------------------------------|---------------------|-------------|
| <b>Cardiac Dysplasia</b>        | 7.88E-03 - 7.88E-03 | 1           |
| <b>Congenital Heart Anomaly</b> | 7.88E-03 - 7.88E-03 | 1           |
| <b>Cardiac Infarction</b>       | 1.19E-01 - 1.21E-02 | 7           |
| <b>Cardiac Enlargement</b>      | 5.85E-01 - 1.57E-02 | 5           |
| <b>Cardiac Inflammation</b>     | 1.29E-01 - 1.57E-02 | 2           |

### Hepatotoxicity

| Name                                        | p-value range       | # Molecules |
|---------------------------------------------|---------------------|-------------|
| <b>Hepatocellular carcinoma</b>             | 2.48E-01 - 1.01E-10 | 22          |
| <b>Liver Hyperplasia/Hyperproliferation</b> | 2.48E-01 - 1.01E-10 | 81          |
| <b>Liver Cirrhosis</b>                      | 1.89E-01 - 6.18E-05 | 6           |
| <b>Liver Inflammation/Hepatitis</b>         | 4.65E-01 - 1.84E-04 | 6           |
| <b>Liver Necrosis/Cell Death</b>            | 4.11E-02 - 1.00E-02 | 6           |

### Nephrotoxicity

| Name                                        | p-value range       | # Molecules |
|---------------------------------------------|---------------------|-------------|
| <b>Renal Damage</b>                         | 7.61E-02 - 9.53E-05 | 11          |
| <b>Renal Tubule Injury</b>                  | 5.71E-02 - 9.53E-05 | 7           |
| <b>Renal Enlargement</b>                    | 1.05E-01 - 7.88E-03 | 2           |
| <b>Renal Hyperplasia/Hyperproliferation</b> | 7.88E-03 - 7.88E-03 | 1           |
| <b>Nephrosis</b>                            | 1.15E-01 - 1.18E-02 | 3           |

### Top Regulator Effect Networks

| ID       | Regulators   | Disease & Functions                      | Consistency Score |
|----------|--------------|------------------------------------------|-------------------|
| <b>1</b> | CGA,IL6,XBP1 | Engulfment of tumor cell lines (+3 more) | 8.442             |
| <b>2</b> | MLXIPL,MYC   | Cell death of osteosarcoma cells         | 6.0               |
| <b>3</b> | PDX1         | Infection by RNA virus                   | .5                |
| <b>4</b> | Insulin      | Cell survival                            | -3.402            |
| <b>5</b> | OSM          | Cell movement of tumor cell lines        | -4.082            |

### Top Networks

| ID       | Associated Network Functions                                                    | Score |
|----------|---------------------------------------------------------------------------------|-------|
| <b>1</b> | RNA Post-Transcriptional Modification, RNA Damage and Repair, Protein Synthesis | 69    |
| <b>2</b> | RNA Damage and Repair, Protein Synthesis, Cell Signaling                        | 63    |



|   |                                                                          |    |
|---|--------------------------------------------------------------------------|----|
| 3 | Cancer, Connective Tissue Disorders, Organismal Injury and Abnormalities | 31 |
| 4 | Cell Morphology, Cellular Assembly and Organization, Cellular Compromise | 31 |
| 5 | Connective Tissue Disorders, Immunological Disease, Inflammatory Disease | 31 |

### Top Tox Lists

| Name                                                      | p-value  | Overlap     |
|-----------------------------------------------------------|----------|-------------|
| <b>Mitochondrial Dysfunction</b>                          | 9.37E-06 | 5.2 % 9/172 |
| <b>NRF2-mediated Oxidative Stress Response</b>            | 6.39E-04 | 3.3 % 8/239 |
| <b>Acute Renal Failure Panel (Rat)</b>                    | 1.46E-03 | 6.5 % 4/62  |
| <b>Cardiac Necrosis/Cell Death</b>                        | 1.06E-02 | 2.3 % 7/304 |
| <b>Nongenotoxic Hepatocarcinogenicity Biomarker Panel</b> | 1.29E-02 | 9.1 % 2/22  |

### Top My Lists

### Top My Pathways

## Top Analysis-Ready Molecules

## Expr Fold Change

| Molecules               | Expr. Value | Chart |
|-------------------------|-------------|-------|
| <a href="#">H2AZ1</a>   | ↑ 8.040     |       |
| <a href="#">HNRNPA1</a> | ↑ 6.520     |       |
| <a href="#">YWHAH</a>   | ↑ 5.230     |       |
| <a href="#">COL1A2</a>  | ↑ 5.190     |       |
| <a href="#">RPL14</a>   | ↑ 4.670     |       |
| <a href="#">RBMX</a>    | ↑ 4.570     |       |
| <a href="#">DDX5</a>    | ↑ 4.310     |       |
| <a href="#">EIF4A3</a>  | ↑ 4.240     |       |
| <a href="#">SET</a>     | ↑ 4.240     |       |
| <a href="#">SRSF3</a>   | ↑ 4.170     |       |

## Expr Fold Change

| Molecules                | Expr. Value | Chart |
|--------------------------|-------------|-------|
| <a href="#">CALB1</a>    | ↓ -5.420    |       |
| <a href="#">RIDA</a>     | ↓ -5.370    |       |
| <a href="#">FTCD</a>     | ↓ -4.810    |       |
| <a href="#">FMO1</a>     | ↓ -4.780    |       |
| <a href="#">AGXT2</a>    | ↓ -4.710    |       |
| <a href="#">SFXN2</a>    | ↓ -4.510    |       |
| <a href="#">COX4I1</a>   | ↓ -4.340    |       |
| <a href="#">SLC25A10</a> | ↓ -4.220    |       |

|              |          |
|--------------|----------|
| <b>ALAD</b>  | ↓ -4.070 |
| <b>DDAH1</b> | ↓ -3.970 |
